# Supplementary material for: Molecular analysis of single circulating tumour cells following long‐term storage of clinical samples
Source: PubMed Central journal article supplement (PMC5709616; doi:10.1002/1878-0261.12113), 2017-10-24

# Supplementary Figure S1

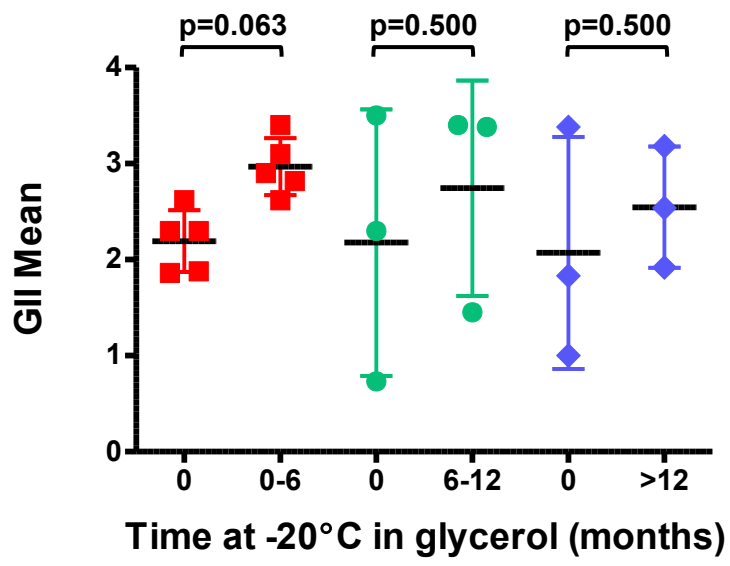

Supplement: MOL2-11-1687-s001.pdf [file MOL2-11-1687-s001.pdf]
